# Supplementary material
Source: PubMed Central journal article supplement (PMC6774888)
Supplement: NIHMS1534333-supplement-1.pdf [file NIHMS1534333-supplement-1.pdf]

# Supplemental Information

## **12-lipoxygenase regulates cold adaptation and glucose metabolism by producing the omega-3 lipid 12-HEPE from brown fat**

Luiz Osório Leiria, Chih-Hao Wang, Matthew D. Lynes, Kunyan Yang, Farnaz Shamsi, Mari Sato, Satoru Sugimoto, Emily Y. Chen, Valerie Bussberg, Niven R. Narain, Brian E. Sansbury, Justin Darcy, Tian Lian Huang, Sean D. Kodani, Masaji Sakaguchi, Andréa L. Rocha, Tim J. Schulz, Alexander Bartelt, Gökhan S. Hotamisligil, Michael F. Hirshman, Klaus van Leyen, Laurie J. Goodyear, Matthias Blüher, Aaron M. Cypess, Michael A. Kiebish, Matthew Spite, Yu-Hua Tseng.

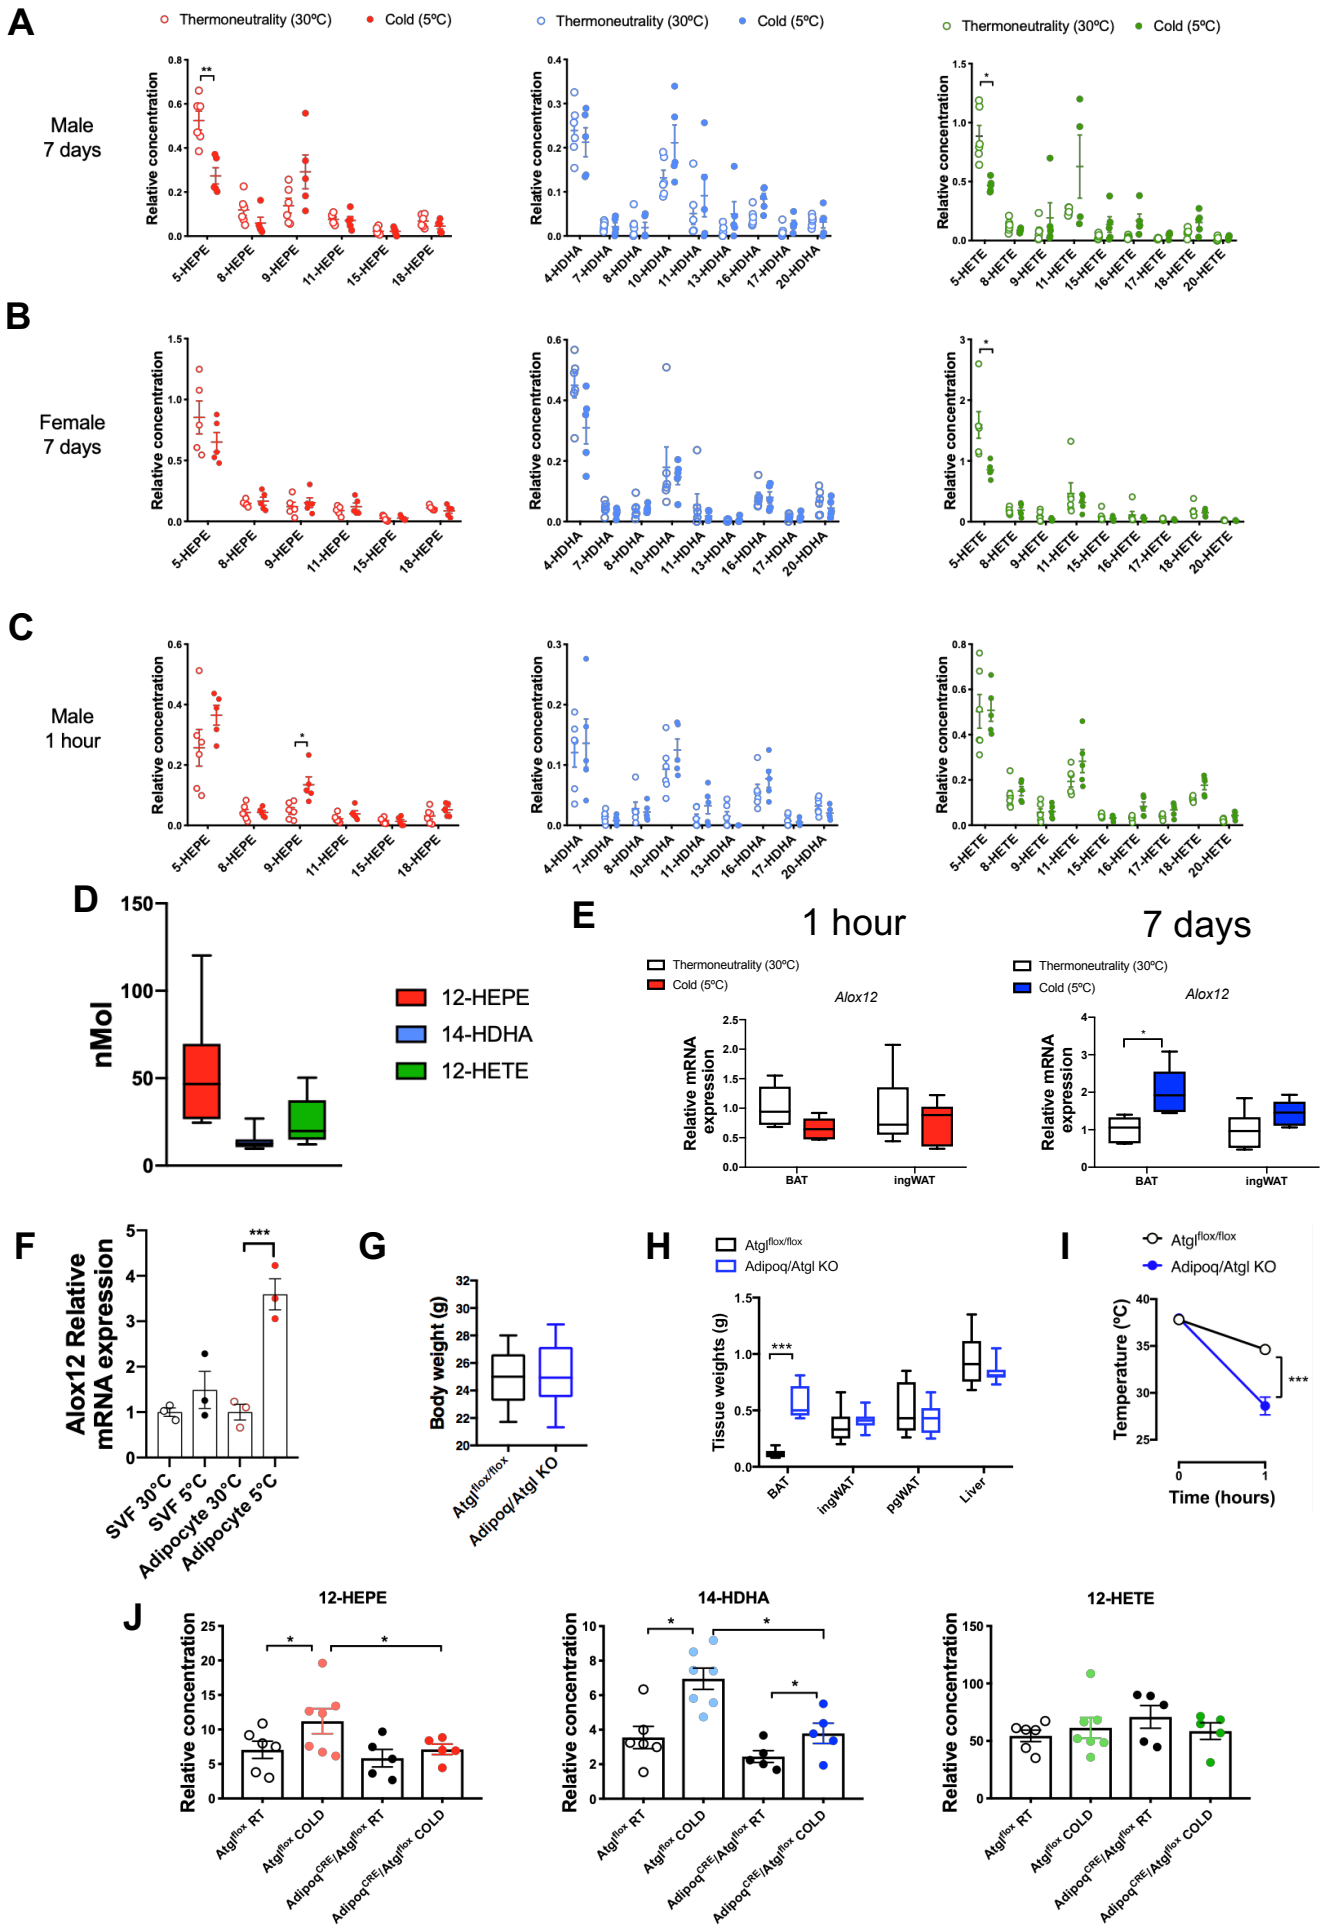

**Figure S1. A coordinated 12-LOX and lipolysis-dependent release of lipid metabolites under cold exposure. Related to Figure 1.**

- A) Circulating levels of EPA, DHA and AA derived metabolites HEPEs, HDHAs and HETEs from male mice exposed to thermoneutrality or cold for 7 days (n = 5).
- B) Circulating levels of the EPA, DHA and AA derived metabolites HEPEs, HDHAs and HETEs from female mice exposed to thermoneutrality or cold for 7 days (n = 5).
- C) Circulating levels of the EPA, DHA and AA derived metabolites HEPEs, HDHAs and HETEs from male mice exposed to cold or room temperature for 1 hour (n = 5).
- D) Quantitative values of circulating 12-HEPE, 14-HDHA and 12-HETE concentrations in mice exposed to cold or thermoneutrality for 7 days (n = 7). Targeted lipidomics was used for lipid quantification.
- E) *Alox12* mRNA expression measured by qPCR in subcutaneous inguinal white adipose tissue (sqWAT) and brown adipose tissue (BAT) from C57BL6/J mice exposed to cold or thermoneutrality for 1 hour or 7 days.
- F) *Alox12* mRNA expression measured by qPCR in stromal vascular fraction and adipocytes extracted from perigonadal white adipose tissue (pgWAT), ingWAT and BAT of mice housed in cold or thermoneutrality for 7 days (n= 3).
- G) Body weights of *Atgl<sup>flox/flox</sup>* mice and *Adipoq<sup>CRE</sup>/Atgl KO* mice (n = 10).
- H) Weight of BAT, ingWAT, pgWAT and liver dissected from *Atgl<sup>flox/flox</sup>* mice and *Adipoq<sup>CRE</sup>/Atgl KO* mice (n = 10).
- I) Rectal temperature measured during cold tolerance test in *Atgl<sup>flox/flox</sup>* and *Adipoq<sup>CRE</sup>/Atgl KO* groups (n = 5).
- J) 12-HEPE, 14-HDHA and 12-HETE serum levels in *Atgl<sup>flox</sup>* and *Adipoq<sup>CRE</sup>/Atgl<sup>flox</sup>* mice exposed to cold or room temperature for 1 h. (n = 5 – 6). \*p<0.05, \*\*p<0.01. N=5 per group. Data are represented as mean ± S.E.M. All the lipid quantification data (except for Figure S1D) were detected using non-targeted lipidomics, thus relative values are shown.

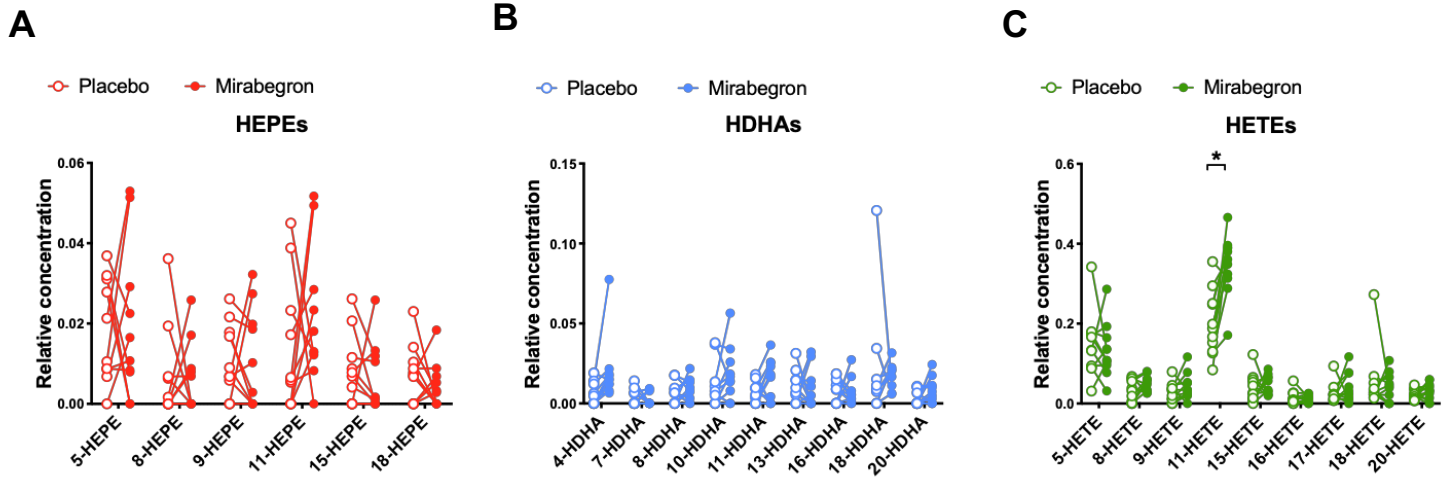

**Figure S2. Effect of mirabegron treatment in the circulating levels of oxylipins. Related to Figure 2.**

A-C) Circulating levels of the EPA, DHA and AA derived metabolites HEPEs, HDHAs and HETEs from human subjects treated with mirabegron (200mg) or placebo. Data are represented as mean (n = 10-11). The lipid quantification data were detected using non-targeted lipidomics, thus relative values are shown.

□ Vehicle  
■ CL316,243

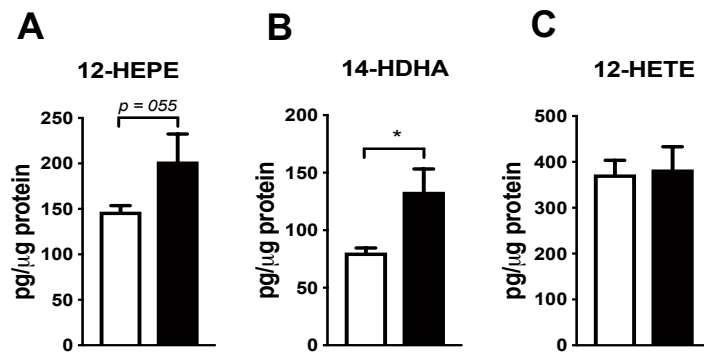

**Figure S3. Production of 12-LOX metabolites from brown adipocytes in response to  $\beta$ 3-adrenergic stimulation. Related to Figure 3.**

A-C) 12-HEPE, 14-HDHA and 12-HETE levels in media by murine brown adipocytes treated with CL316,243. Data are represented as mean  $\pm$  S.E.M (n = 5).

Targeted lipidomics was used for lipid quantification.

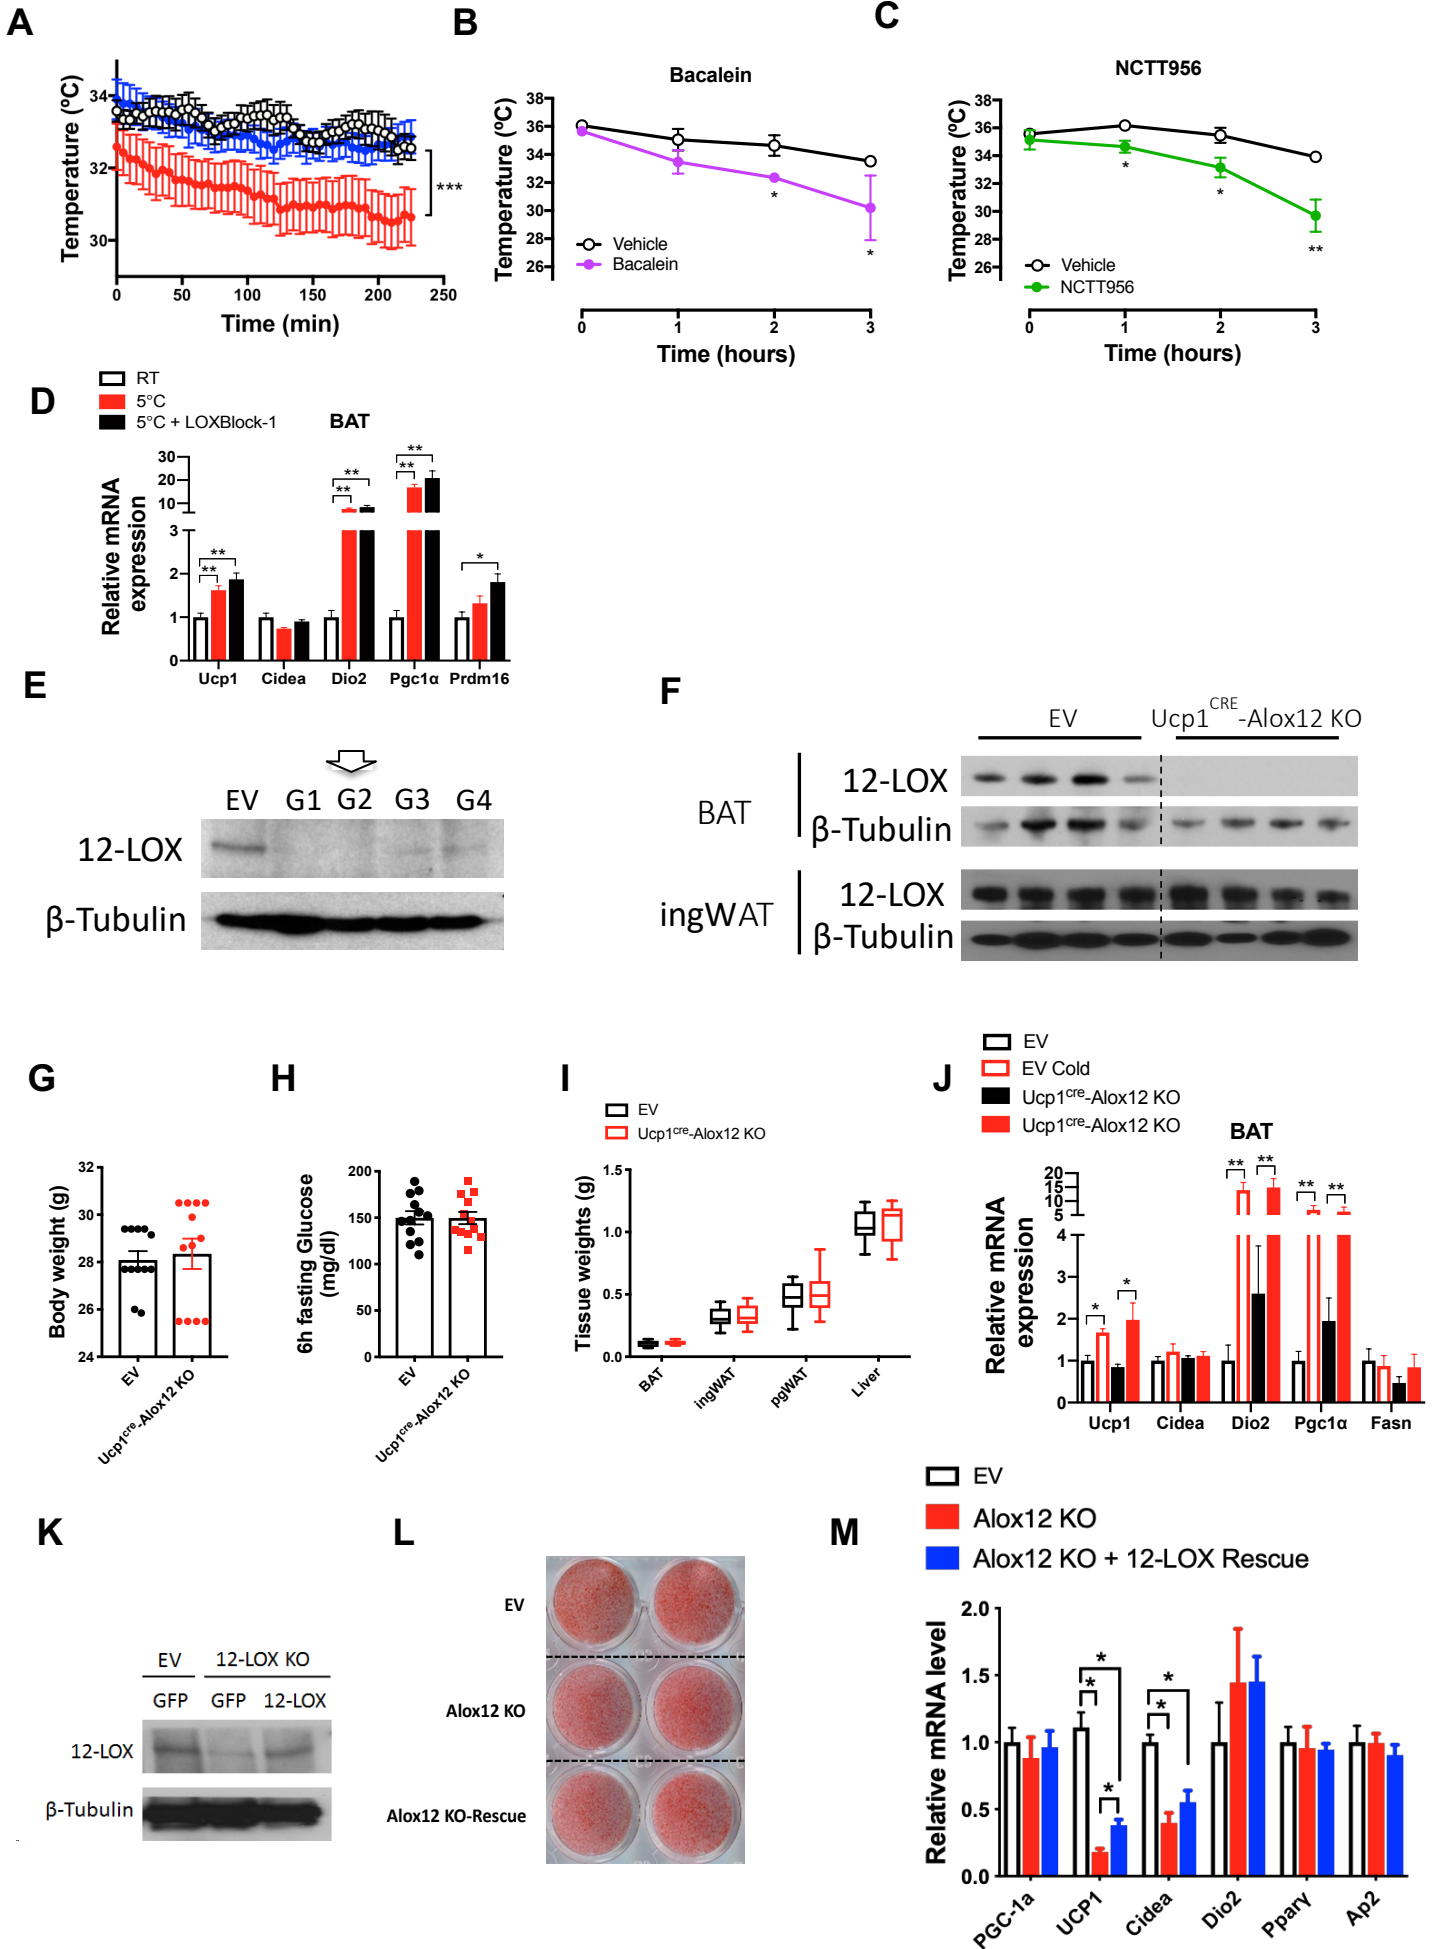

**Figure S4. Effects of suppression of 12-LOX activity via chemical inhibition or genetic deletion in mice and in brown adipocytes. Related to Figure 4.**

- A) Interscapular temperature measured by telemetry during cold tolerance test in C57BL6/J mice treated with vehicle or LOXBlock-1 (n = 5-6).
- B) Rectal temperature measured during cold tolerance test in C57BL6/J mice treated with vehicle or Baicalein (n = 3-5).
- C) Rectal temperature measured during cold tolerance test in C57BL6/J treated with vehicle or NCTT956 (n = 5).
- D) mRNA expression of thermogenesis-related genes measured by qPCR in BAT from vehicle or LOXBlock-1 treated mice housed exposed to cold for 4 hours.
- E) Western blotting for 12-LOX protein expression in brown adipocytes transfected with empty vector (EV), guide RNA 1 (G1), guide RNA 2 (G2), guide RNA 3 (G3) and guide RNA 4 (G4).
- F) Western blotting for 12-LOX protein expression in BAT and ingWAT in EV and Ucp1<sup>cre</sup>/Alox12 KO groups. (n = 6).
- G) Body weights of EV mice and Ucp1<sup>cre</sup>/Alox12 KO mice (n = 12).
- H) 6 hour fasting glycemia in EV mice and Ucp1<sup>cre</sup>/Alox12 KO mice (n = 12).
- I) Weight of BAT, ingWAT, pgWAT and liver dissected from EV mice and Ucp1<sup>cre</sup>/Alox12 KO mice (n = 12).
- J) mRNA expression of thermogenesis-related genes measured by qPCR in BAT from EV mice and Ucp1<sup>cre</sup>/Alox12 KO mice exposed to cold for 4 hours or kept at room temperature (n = 6).
- K) Western blotting for 12-LOX protein expression in EV brown adipocytes transfected with GFP and 12-LOX KO brown adipocytes transfected with GFP or with *Alox12* cDNA.
- L) Oil red-O staining in EV brown adipocytes transfected with GFP and 12-LOX KO brown adipocytes transfected with GFP or with *Alox12* cDNA.
- M) mRNA expression of thermogenesis- and adipogenesis-related genes measured by qPCR in EV brown adipocytes transfected with GFP and 12-LOX KO brown adipocytes transfected with GFP or with *Alox12* cDNA.

\*P<0.05, \*\*P<0.01. Data are represented as mean ± S.E.M.

## Serum from human samples

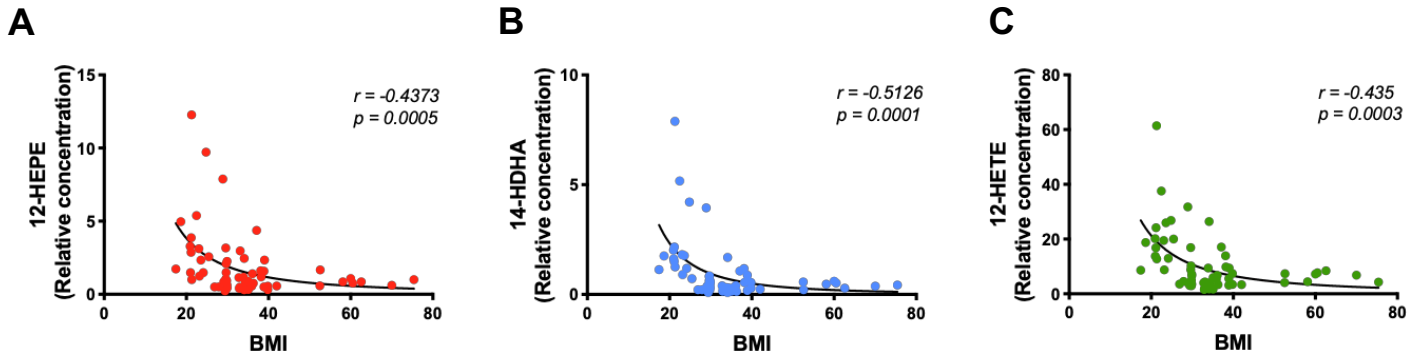

## BAT from mice

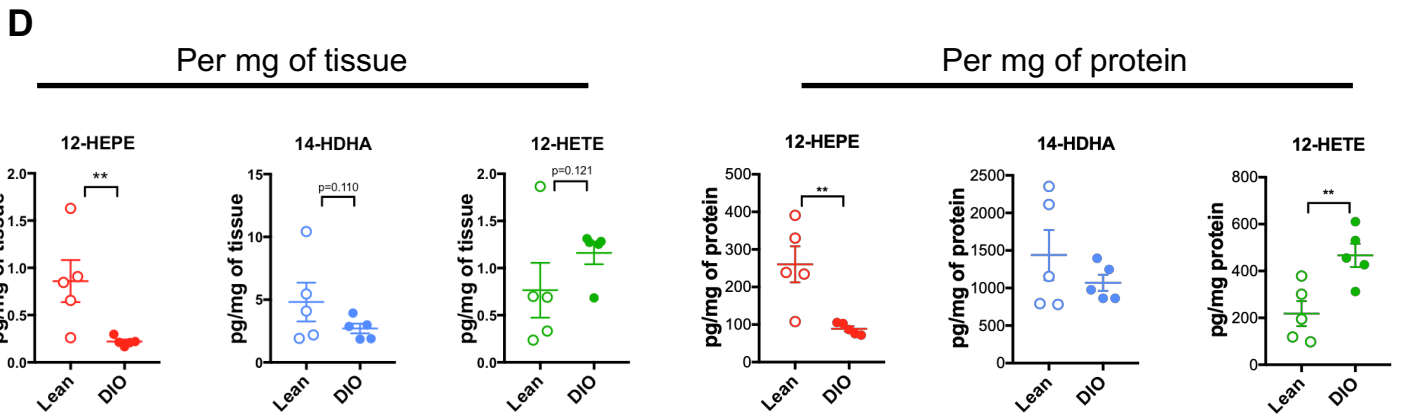

**Figure S5. Obesity reduces circulating levels of 12-LOX products in humans and impairs biosynthesis of 12-LOX metabolites in mouse BAT. Related to Figure 5.**

A-C) Spearman correlation between circulating 12-LOX metabolite levels and body mass index (BMI) in lean (BMI<25), overweight (BMI>25, <30) and obese (BMI>30) subjects (n = 60).

D) Lipid concentration in BAT from lean (Chow) and DIO (HFD) mice normalized to tissue mass and protein content (n = 5-7). Targeted lipidomics was used for lipid quantification.



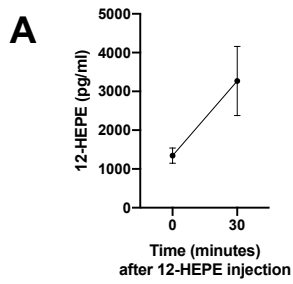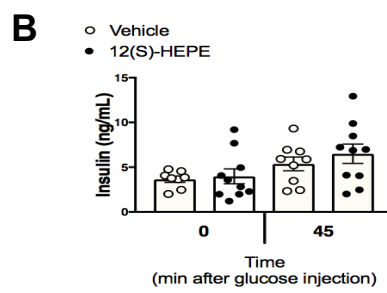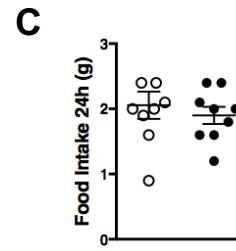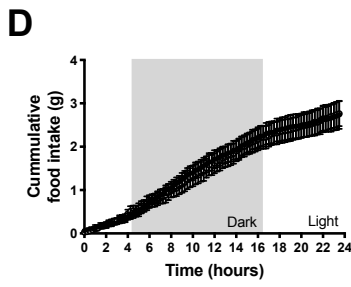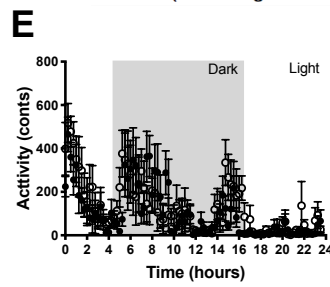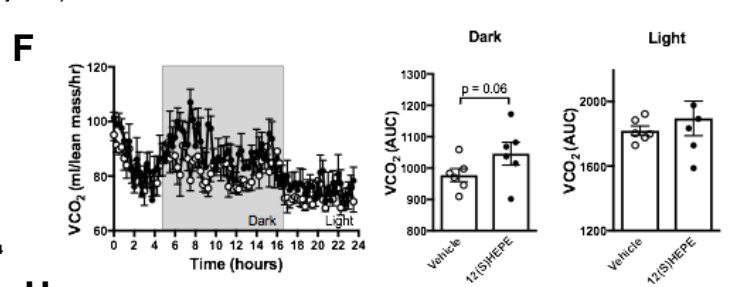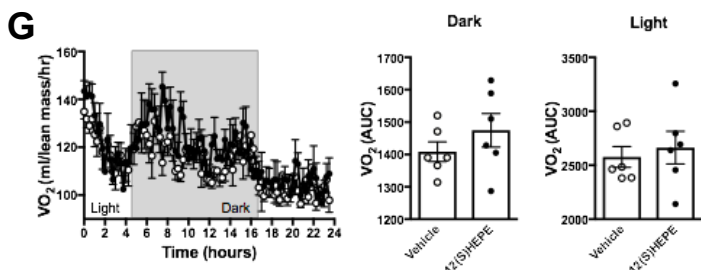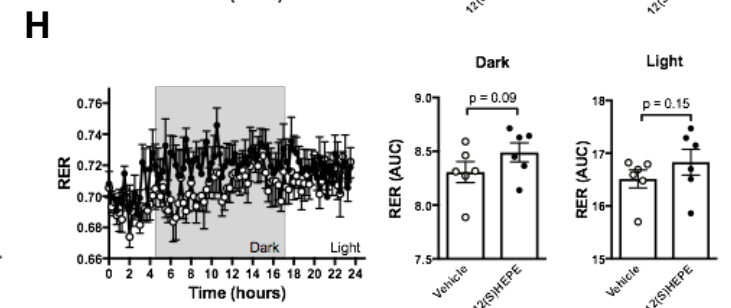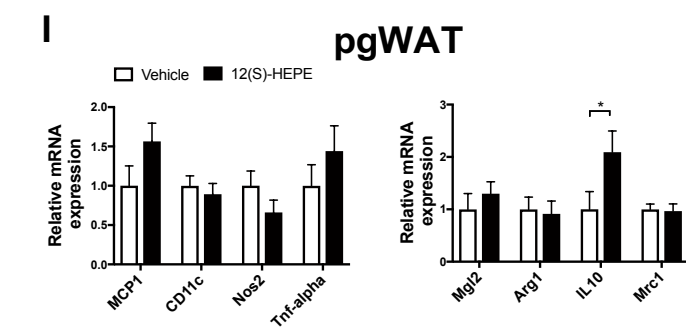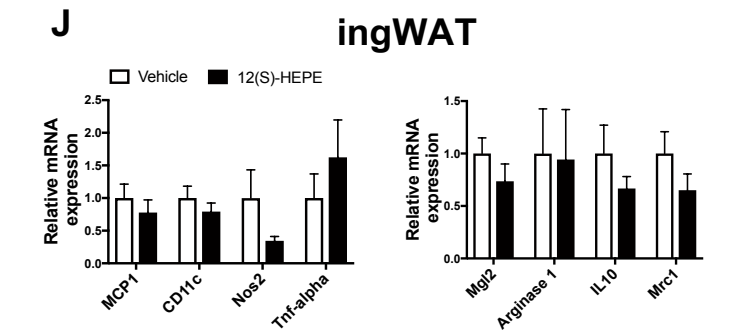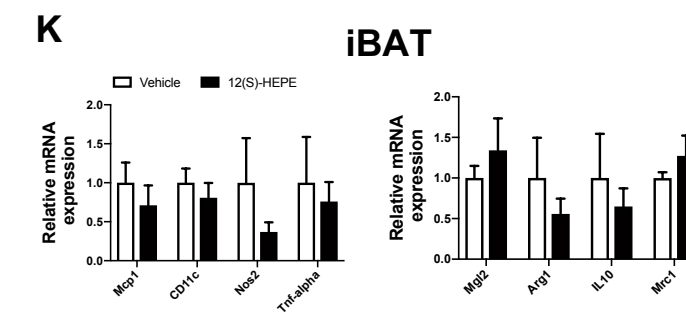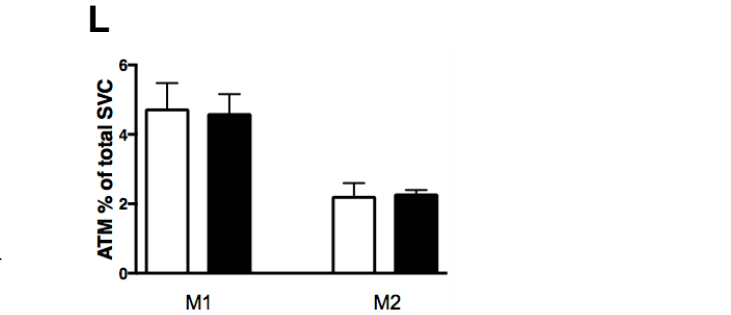

**Figure S6. Effects of 12(S)-HEPE treatment in DIO mice. Related to Figure 6.**

A) Plasma levels of 12-HEPE, before and 30 minutes after a 200 $\mu$ g/kg i.p. injection of 12(S)-HEPE in C57BL6/J mice.

B) Glucose-stimulated insulin release measured at time 0 and 45 min after dextrose injection (2g/kg) in DIO mice treated chronically with 12(S)-HEPE or Vehicle.

C) Food intake of DIO mice treated chronically with 12(S)-HEPE or Vehicle, measured in individual cages.

D) Cumulative food intake of DIO mice treated chronically with 12(S)-HEPE or Vehicle, monitored during 24 hours by CLAMS (n = 6).

E) Spontaneous activity of DIO mice treated chronically with 12(S)-HEPE or Vehicle, monitored during 24 hours by CLAMS (n = 6).

F-H) Volume of carbon dioxide consumption (VCO<sub>2</sub>), volume of oxygen consumption (VO<sub>2</sub>), and respiratory exchange ratio (RER) of DIO mice chronically treated with 12(S)-HEPE or Vehicle, monitored during 24 hours by CLAMS (n = 6).

I-K) Relative mRNA expression of anti-inflammatory and pro-inflammatory genes measured qPCR in pgWAT (H), ingWAT (I) and BAT (J) from DIO mice chronically treated with 12(S)-HEPE or Vehicle.

L) Flow cytometry analysis of M1 and M2 macrophage infiltration in the stromal vascular fraction (SVF) of pgWAT from mice treated with 12(S)-HEPE or vehicle. M1 macrophages were identified as F4/80+/CD11c+/CD206- and M2 were identified as F4/80+/CD11c-/CD206+ cells (n = 8).

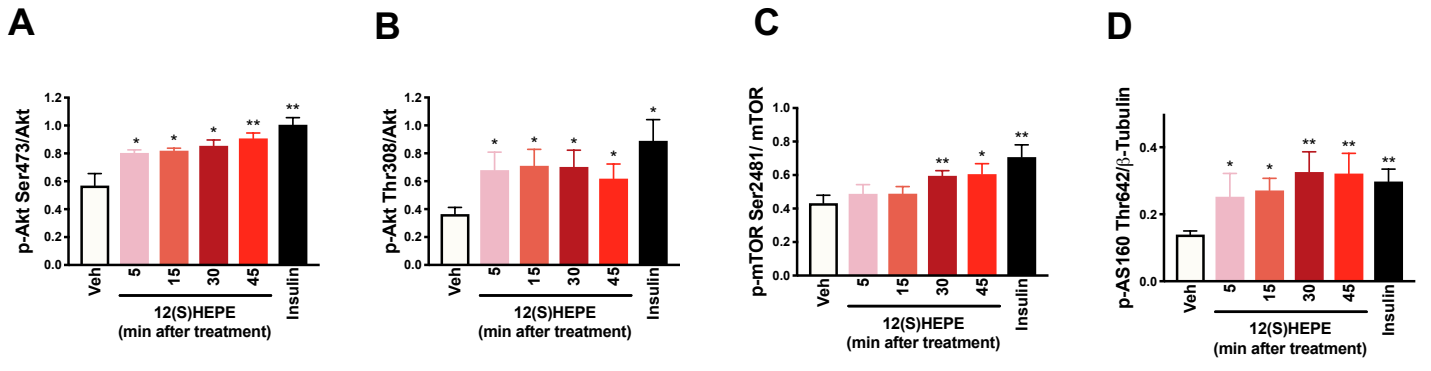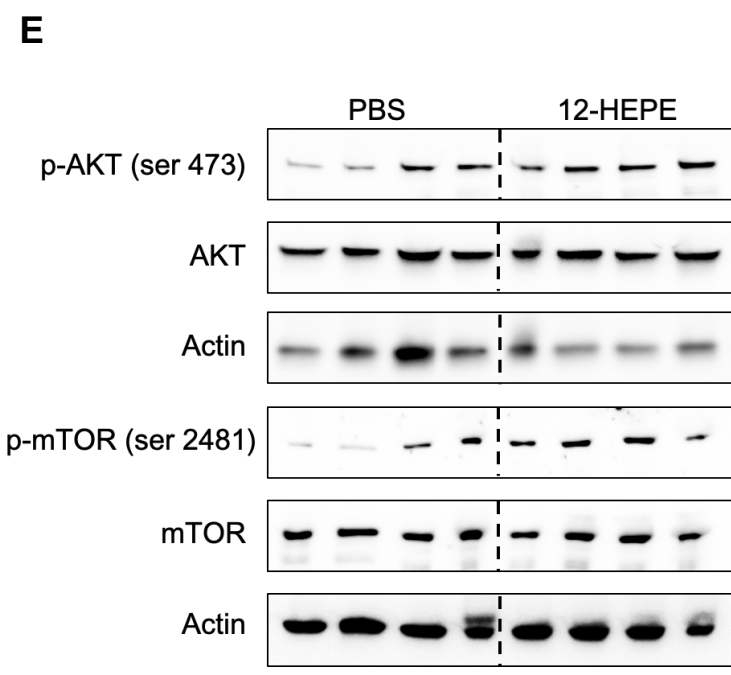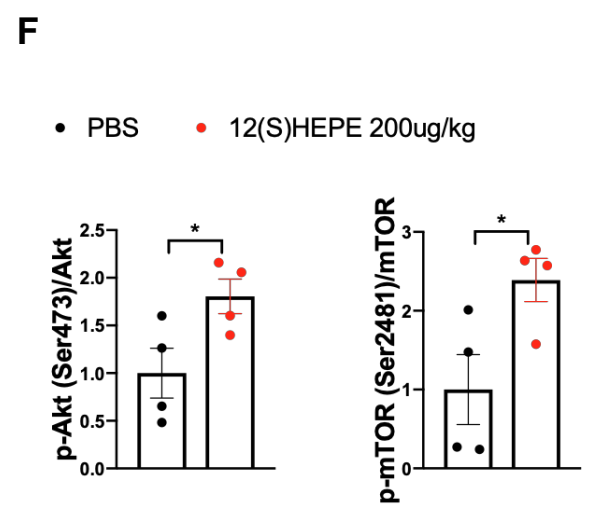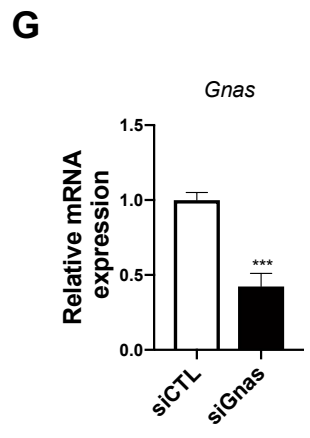

**Figure S7. 12(S)-HEPE stimulates the AKT/mTORC2 pathway in brown adipocytes *in vitro* and *in vivo*. Related to Figure 7.**

A) Quantification of Akt phosphorylated at Ser473 protein expression detected by western blotting of samples from murine brown adipocytes treated with 12(S)-HEPE or vehicle normalized to total Akt protein expression (n = 5).

B) Quantification of Akt phosphorylated at Th308 protein expression detected by western blotting of samples from murine brown adipocytes treated with 12(S)-HEPE or vehicle normalized to total Akt protein expression (n = 5).

C) Quantification of mTORC2 phosphorylated at Ser2481 protein expression detected by western blotting of samples from murine brown adipocytes treated with 12(S)-HEPE or vehicle normalized to total mTOR protein expression (n = 6).

D) Quantification of AS160 phosphorylated at Th642 protein expression detected by western blotting of samples from murine brown adipocytes treated with 12(S)-HEPE or vehicle normalized to  $\beta$ -Tubulin protein expression (n = 5).

E) Western blot images of phospho-AKT (Ser473), Akt, phospho-mTORC2 (Ser2481), mTOR and actin in BAT from 12(S)-HEPE or PBS-injected mice (i.v., 10min).

F) Quantification of protein expression of phospho-AKT (Ser473) normalized by total Akt or actin, and phospho-mTORC2 (Ser2481) normalized by total mTOR or actin in BAT from 12(S)-HEPE or PBS-injected mice. n\*P<0.05, \*\*P<0.01, \*\*\*P<0.001, in comparison to vehicle treated cells. Data are represented as mean  $\pm$  S.E.M.

G) *Gnas* mRNA expression in murine brown adipocytes transfected with *Gnas* siRNA or control siRNA.

**Supplemental Table 1: List of primers and sequences. *Related to Star Methods.***

| <b>Gene name</b> | <b>Forward Primer</b>     | <b>Reverse Primer</b>    |
|------------------|---------------------------|--------------------------|
| Alox12           | TCCCTCAACCTAGTGCGTTTG     | GTTGCAGCTCCAGTTTCGC      |
| Gnas             | CAGAGCCTCCATTGGGGTC       | GCTTCTCGCTCAACTGGGG      |
| Glut1            | CAGTTCGGCTATAACACTGGTG    | GCCCCGACAGAGAAGATG       |
| Glut4            | GTGACTGGAACACTGGTCCTA     | CCAGCCACGTTGCATTGTAG     |
| Fasn             | GGCTCTATGGATTACCCAAGC     | CCAGTGTTCGTTCTCCTCGG     |
| Scd1             | TTCTTGCGATACACTCTGGTGC    | CGGGATTGAATGTTCTTGTCGT   |
| Chrebp-beta      | TCTGCAGATCGCGTGGAG        | CTTGTCCCGGCATAGCAAC      |
| Chrebp-alpha     | CGACTCACCCACCTCTTC        | TTGTTAGCCGGATCTTGTC      |
| Srebp1c          | GCAGCCACCATCTAGCCTG       | CAGCAGTGAGTCTGCCTTGAT    |
| Ucp1             | CTGCCAGGACAGTACCCAAG      | TCAGCTGTTCAAAGCACACA     |
| Acl              | GCCAGCGGGAGCACATC         | CTTTGCAGGTGCCACTTCATC    |
| Ppargc1a         | CCCTGCCATTGTTAAGACC       | TGCTGCTGTTCTGTTTTC       |
| Dio2             | CAGTGTGGTGCCTGCTCCAATC    | TGAACCAAAGTTGACCACCAG    |
| Cpt1b            | CGAGGATTCTCTGGAAGTGC      | GGTCGCTTCTTCAAGGTCTG     |
| Cidea            | ATCACAACCTGGCCTGGTTACG    | TACTACCCGGTGTCCATTTCT    |
| Mcp1             | AGGTCCTGTGCATGCTTCTG      | TCATTGGGATCATCTTGCTG     |
| Nos2             | TAGTTTCCAGAAGCAGAATGTGACC | CCAAGACTCTAAATCGGATCTCTC |
| Cd11c            | CAGAACTTCCCAACTGCACA      | TCTCTGAAGCTGGCTCATCA     |
| Tnfa             | CCACCACGCTCTTCTGTCT       | GCTCCTCCACTTGGTGGTTT     |
| Mgl2             | GGAAGCCAAGACTTCACACA      | CTCTTCCCGCTCCAAGTTCT     |
| Arginase1        | AGACCACAGTCTGGCAGTTG      | CCACCCAAATGACACATAGG     |
| Il10             | AGTGGAGCAGGTGAAGAGTG      | CACTGCAGGTGTTTTAGCTTT    |
| Mrc1             | TGATTACGAGCAGTGGAAGC      | GTTACCGTAAGCCCAATTT      |
